# Supplementary material for: The effect of hyperbranched poly(acrylic acid)s on the morphology and size of precipitated nanoscale (fluor)hydroxyapatite
Source: Royal Society of Chemistry journal article supplement (doi:10.1039/c7tb00144d), 2017-01-01

Electronic supporting information for:

## **The effect of hyperbranched poly(acrylic acid)s on the morphology and size of precipitated nanoscale (fluor)hydroxyapatite**

Laura Shallcross, <sup>a,b</sup> Kevin Roche, <sup>c</sup> Caroline J. Wilcock, <sup>b</sup> Kenneth T. Stanton, <sup>c</sup> Thomas Swift, <sup>d</sup> Stephen Rimmer, <sup>d</sup> Paul V. Hatton, <sup>b,\*</sup> Sebastian G. Spain <sup>a,\*</sup>

a. Polymer and Biomaterials Chemistry Laboratories Department of Chemistry, University of Sheffield, Brook Hill, Sheffield, S3 7HF, UK.

b. Bioengineering and Health Technologies Group, School of Clinical Dentistry, University of Sheffield, 19 Claremont Crescent, Sheffield, S10 2TA, UK.

c. School of Mechanical and Materials Engineering, University College Dublin, Belfield, Dublin 4, Ireland

d. School of Chemistry and Forensic Sciences, University of Bradford, Bradford, BD7 1DP, UK.

\*Email: [s.g.spain@sheffield.ac.uk](mailto:s.g.spain@sheffield.ac.uk)

### **Contents**

|                                          |   |
|------------------------------------------|---|
| Diffusion-ordered NMR spectroscopy ..... | 2 |
| Quantities for (F)HA synthesis .....     | 4 |
| Additional TEM Images.....               | 5 |

## Diffusion-ordered NMR spectroscopy

DOSY measurements were carried out using Bruker ledbpbpgp2s\_compensated program, modified to have 32 gradient steps. The pulse, delay sequence is shown below in Fig. S1.

It is worth considering that DOSY can be affected by convection internally within the NMR tubes.<sup>1</sup> Studies have shown that this is less problematic for samples in deuterium oxide than for organic solvents such as chloroform or methanol.<sup>1</sup> As such all measurements carried out in deuterated solvents used thin NMR tubes (0.2 mm diameter) to reduce this issue. Gradient strengths were calibrated to provide a diffusion coefficient of  $1.91 \times 10^{-9} \text{ m}^2 \text{ s}^{-1}$  at 298.15 K (gradients operated from 95% to 5% using 16 points with a quadratic decay). The same bipolar LED sequence as for the sample measurements was used, with sine shaped gradient pulses and gradient strengths incremented between 0.28 and 5.19 G mm<sup>-1</sup> in 16 steps equally spaced in gradient squared.

NMR tubes were filled with 0.8 ml solution to a constant volume. One dimensional <sup>1</sup>H experiments were recorded using 16 scans. <sup>1</sup>H diffusion measurements were recorded using an LED sequence with bipolar gradients, with sine shaped gradient strength incremented between 0.28 and 5.19 G mm<sup>-1</sup> in 32 steps equally spaced linearly. Data analyses were performed using TopSpin software version 3.5 (patch level 5).

In order to ensure the accuracy of using the Stokes Einstein equation to get the hydrodynamic radius of the polymer within the NMR tube a correction factor was used regarding the solvent diffusion peak. A blank sample of D<sub>2</sub>O was scanned and gave a diffusion value of  $1.914 \times 10^{-9} \text{ m}^2 \text{ S}^{-1}$ . This measurement was repeated several times ( $n = 3$ ) to ensure accuracy and found to vary by less than 1%. The value is close to the previously measured values for D<sub>2</sub>O / H<sub>2</sub>O mixtures. The number was used to gauge both the diffusion and viscosity of the pure solvent, and then when the diffusion of the solvent with polymer was analysed the viscosity of the sample was determined thus:

$$D_1 \eta_1 = D_2 \eta_2$$

This correction ensured that all hydrodynamic radii calculated using Stokes-Einstein would be accurate. The diffusion values of these polymers were recorded and the hydrodynamic radius calculated (Figure S2 and Table S1).

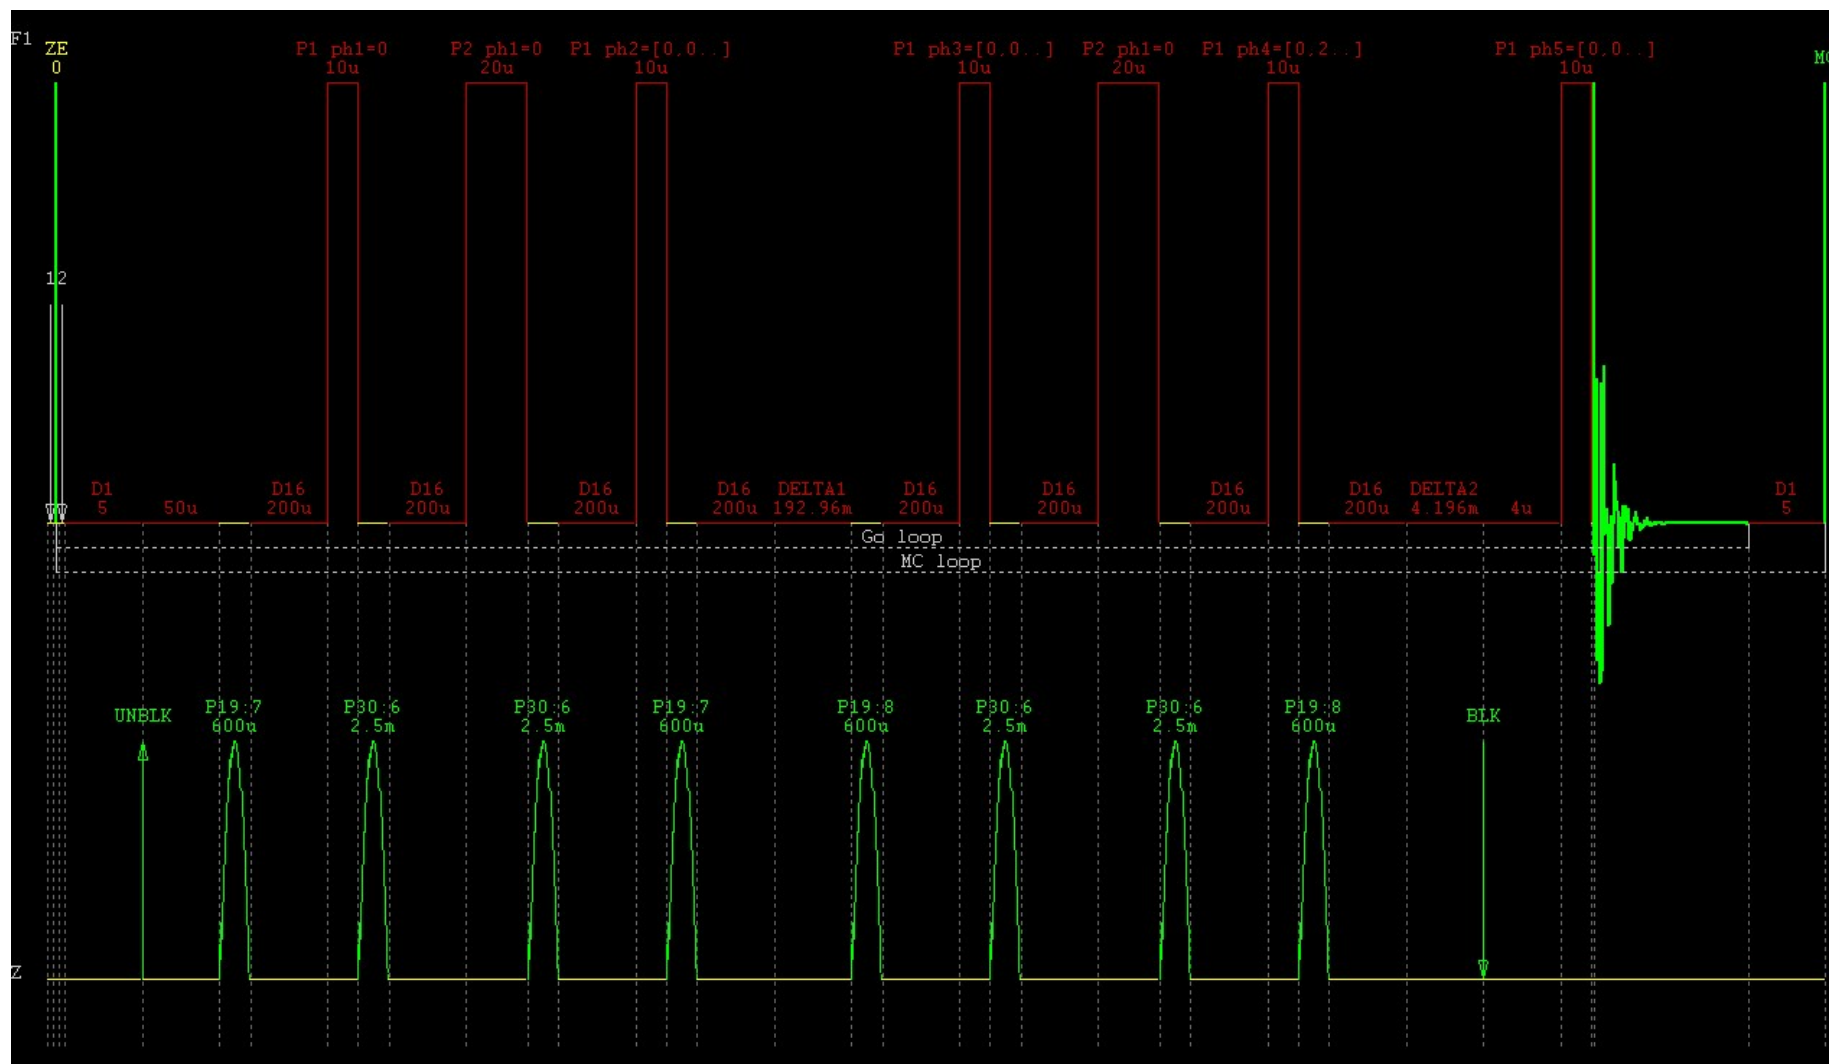

**Figure S1.** Pulse sequence used for DOSY measurements.

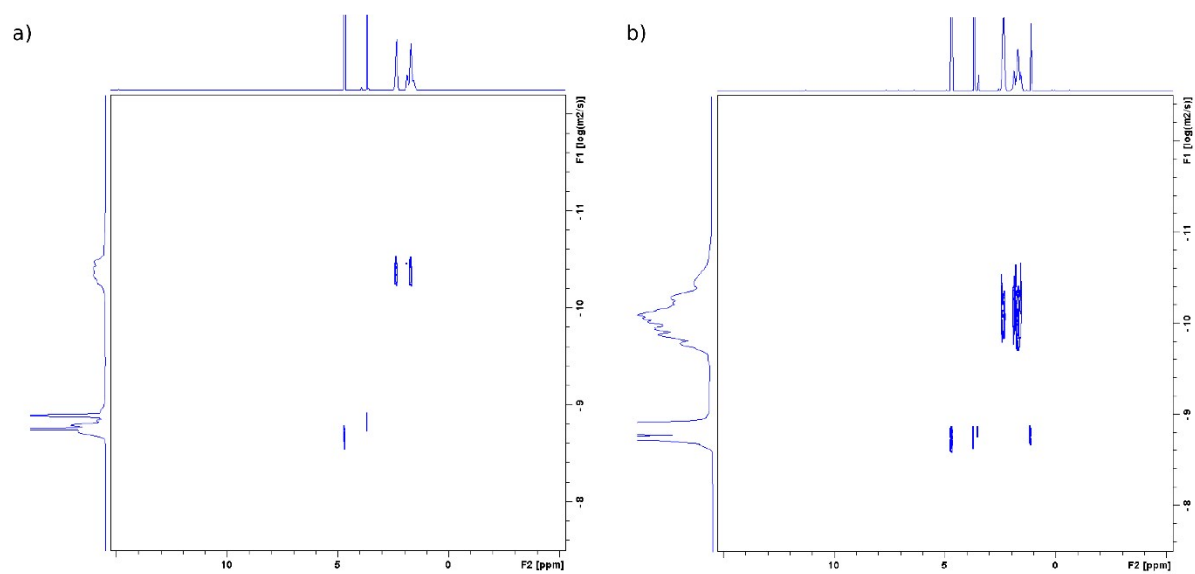

**Figure S2.** DOSY spectra for a) PAA-VDB and b) PAA-VPC.

**Table S1.** DOSY experiment raw data ( $-\log D$ ) and calculated hydrodynamic radii.

| Sample           | Solvent | Polymer | $R_h$ / nm |
|------------------|---------|---------|------------|
| D <sub>2</sub> O | 8.7180  |         |            |
| PAA-VDB          | 8.6850  | 10.3650 | 4.908      |
| PAA-VPC          | 8.7460  | 10.1100 | 2.371      |

## Quantities for (F)HA synthesis

Table S2. Masses of chemicals used in the synthesis of fluorhydroxyapatite and hydroxyapatite varying poly(acrylic acid) additive

| Sample      | CaCl <sub>2</sub><br>/ g | (NH <sub>4</sub> ) <sub>2</sub> HPO <sub>4</sub><br>/ g | NH <sub>4</sub> F<br>/ g | E5<br>/ g | E11<br>/ g | PAA-VPC<br>/ g | PAA-VBD<br>/ g |
|-------------|--------------------------|---------------------------------------------------------|--------------------------|-----------|------------|----------------|----------------|
| FHA-E5      | 5.551                    | 3.993                                                   | 0.234                    | 0.812     | ---        | ---            | ---            |
| FHA-E11     | 5.556                    | 4.012                                                   | 0.235                    | ---       | 0.813      | ---            | ---            |
| FHA-NoP     | 5.553                    | 4.003                                                   | 0.231                    | ---       | ---        | ---            | ---            |
| FHA-PAA-VPC | 5.561                    | 3.992                                                   | 0.234                    | ---       | ---        | 0.202          | ---            |
| FHA-PAA-VBD | 5.546                    | 4.031                                                   | 0.232                    | ---       | ---        | ---            | 0.207          |
| HA-E5       | 5.552                    | 3.997                                                   | ---                      | 0.804     | ---        | ---            | ---            |
| HA-E11      | 5.557                    | 4.011                                                   | ---                      | ---       | 0.811      | ---            | ---            |
| HA-NoP      | 5.555                    | 4.001                                                   | ---                      | ---       | ---        | ---            | ---            |
| HA-PAA-VPC  | 5.543                    | 3.999                                                   | ---                      | ---       | ---        | 0.203          | ---            |
| HA-PAA-VBD  | 5.577                    | 3.987                                                   | ---                      | ---       | ---        | ---            | 0.208          |

## Additional TEM Images

FHA E5

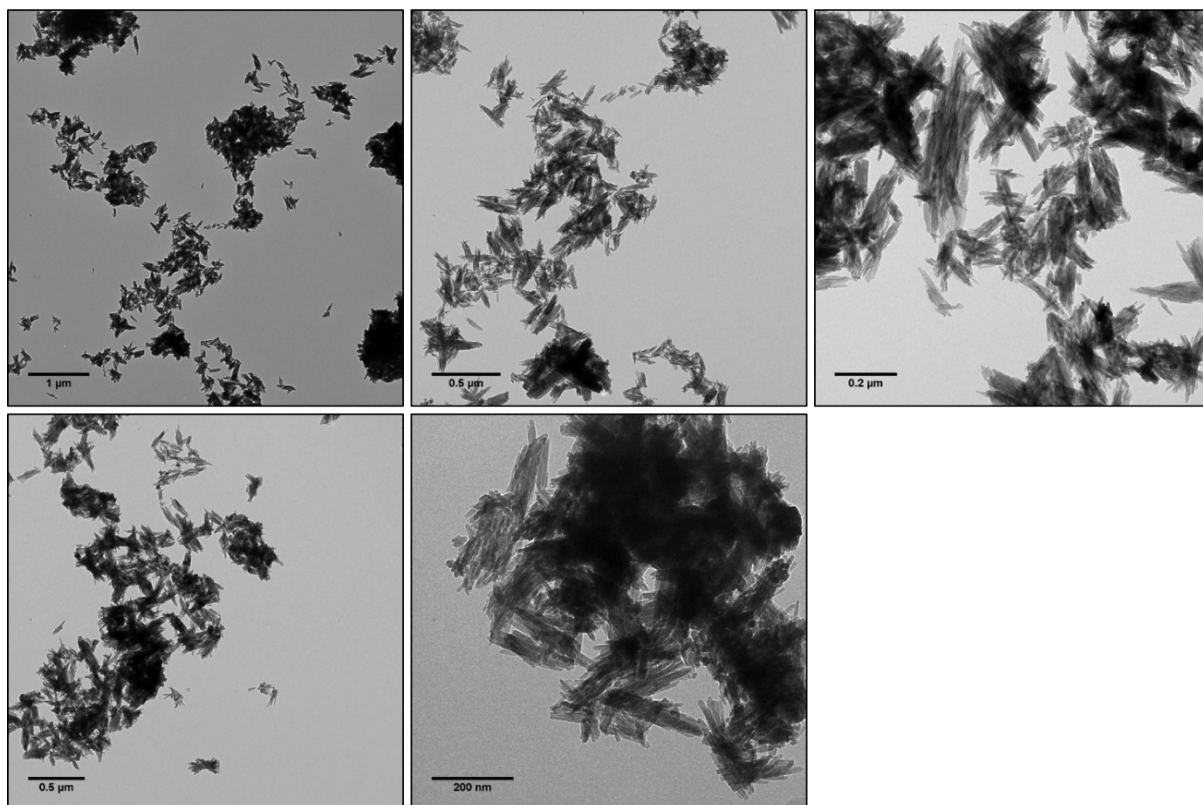

FHA E11

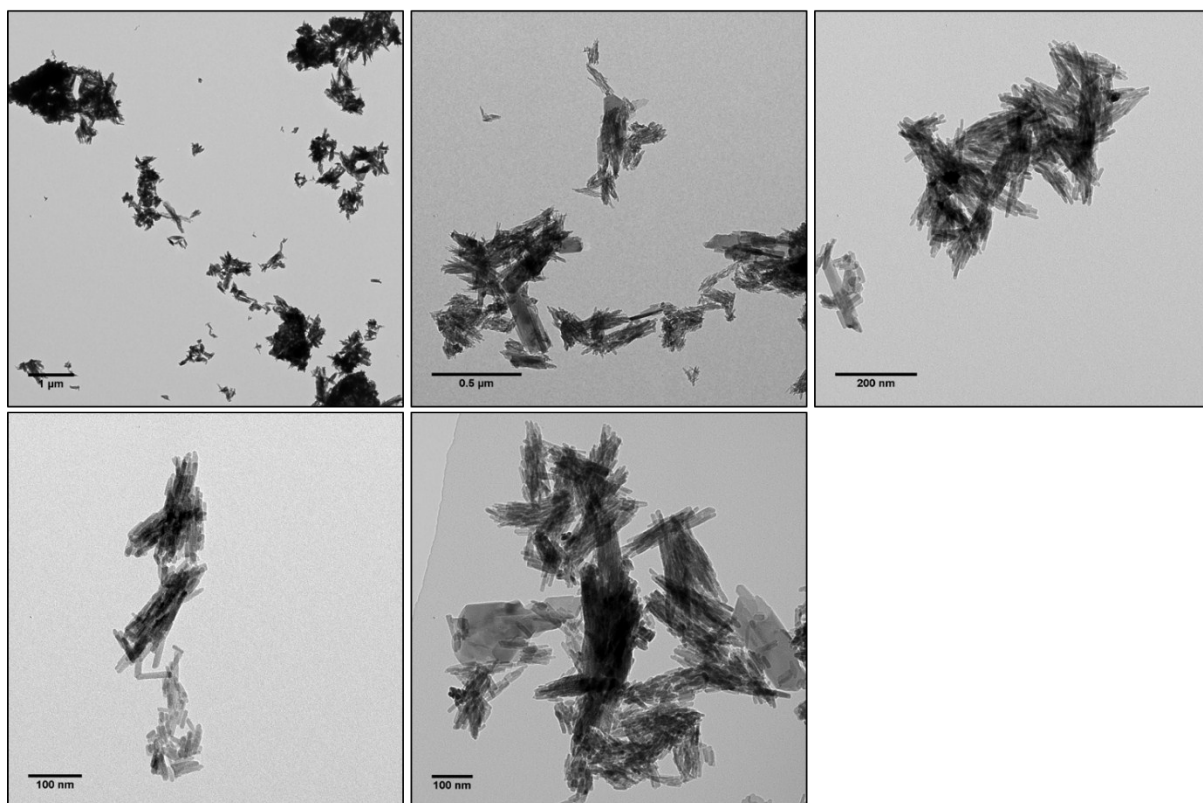

FHA NoP

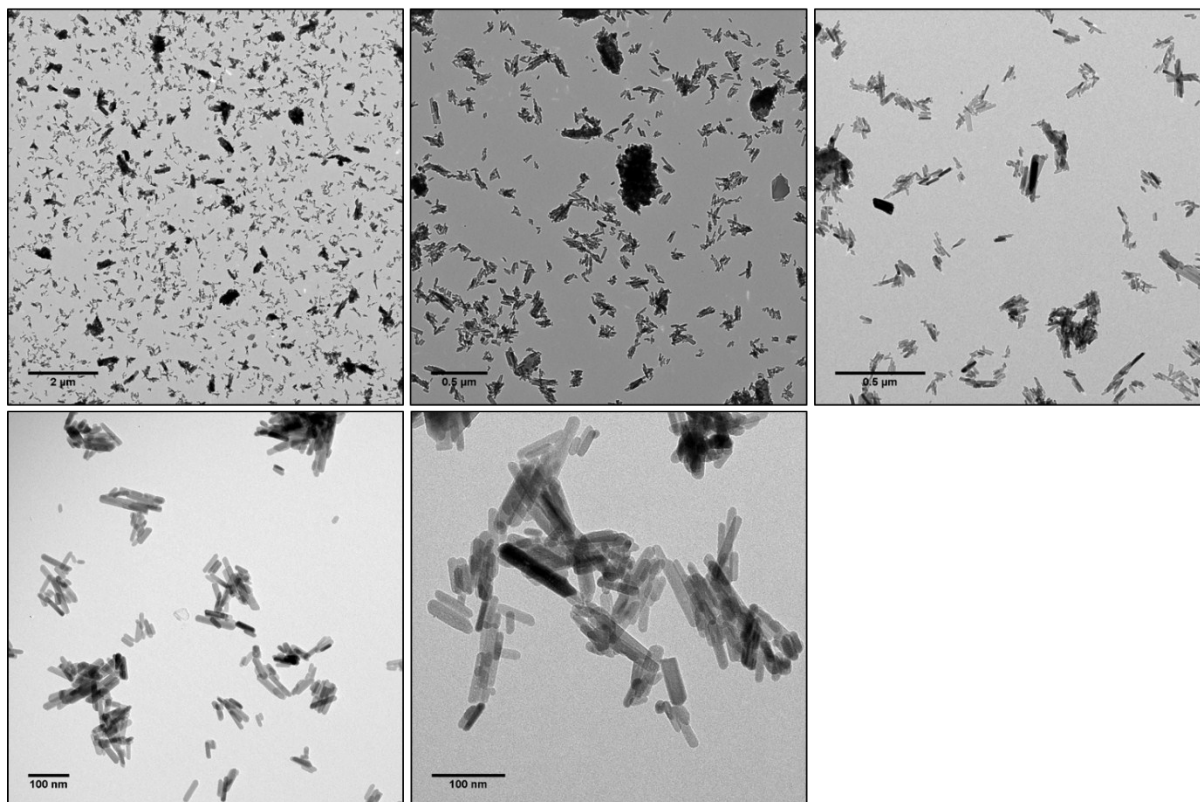

FHA PAA-VBD

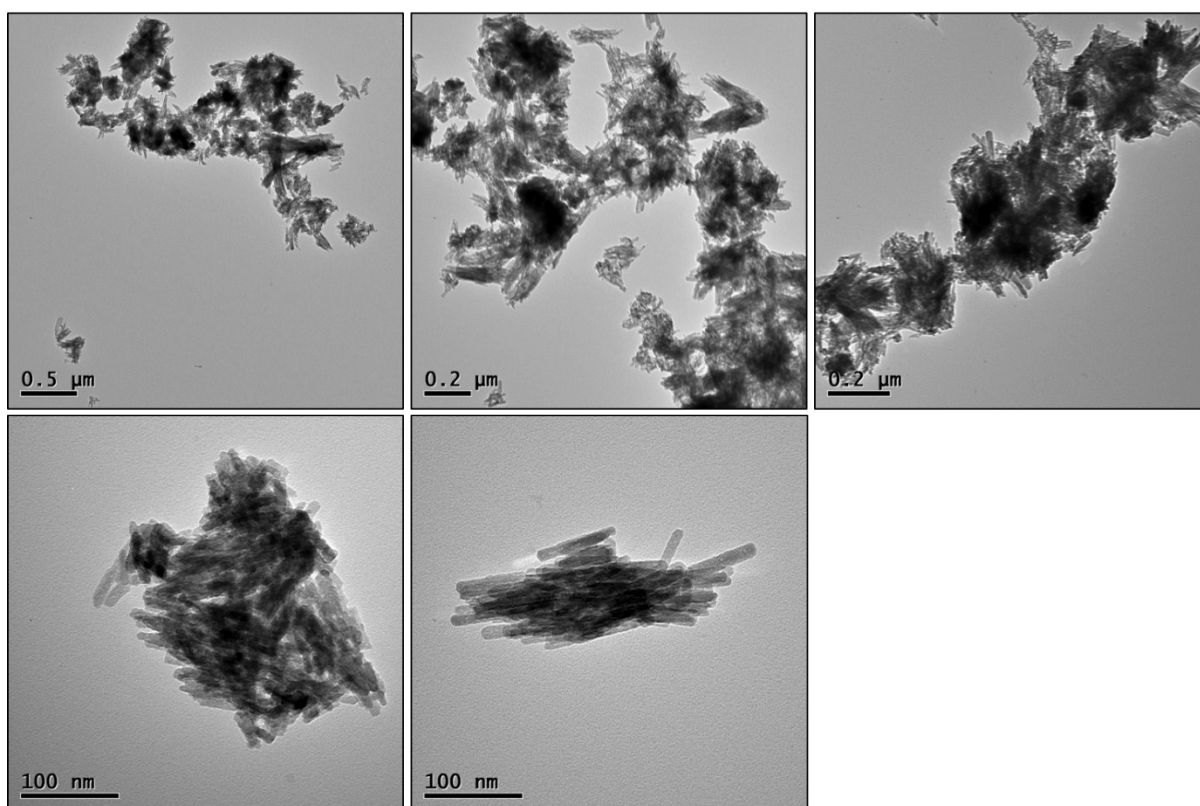

FHA PAA-VPC

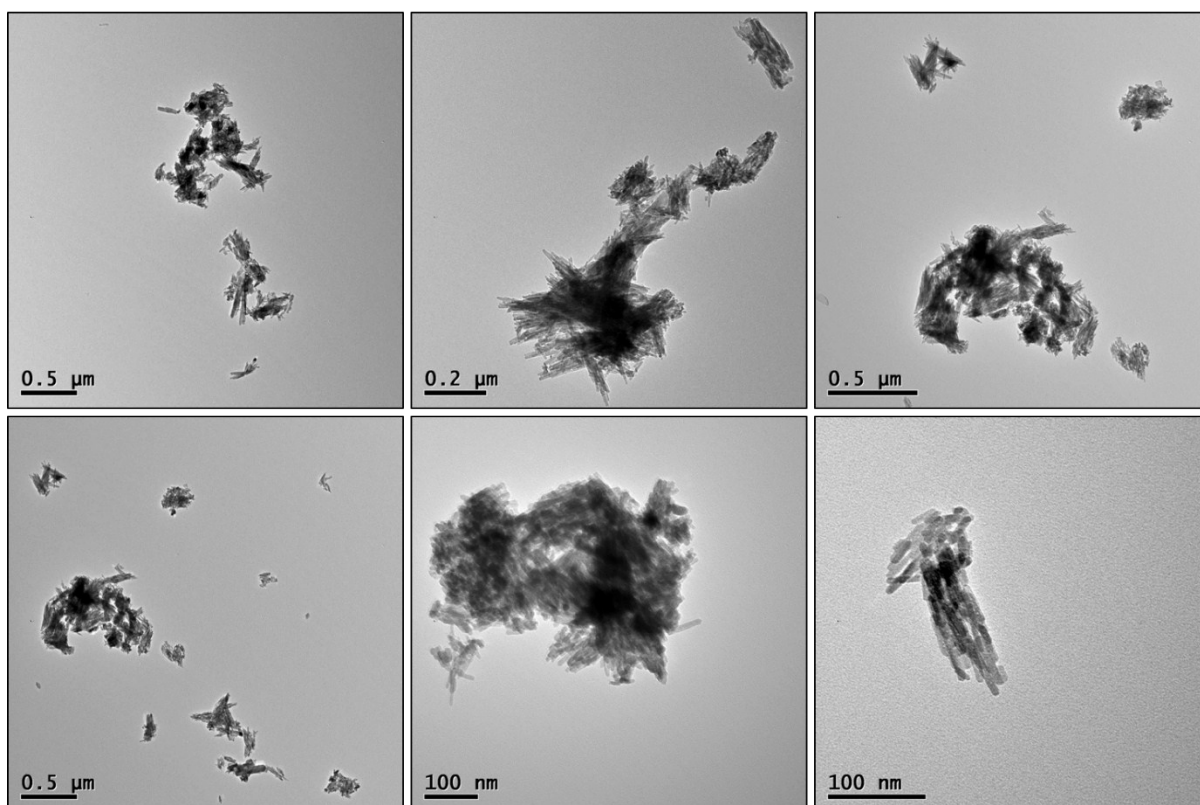

HA E5

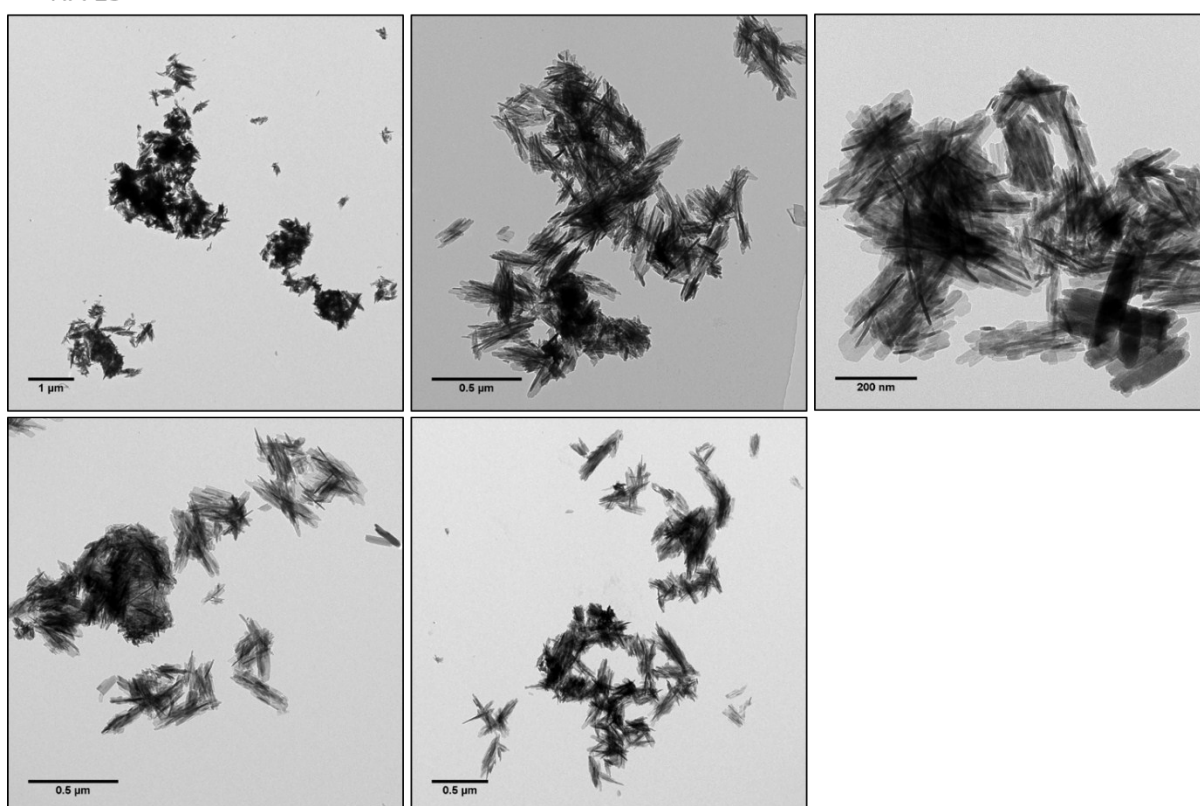



HA E11

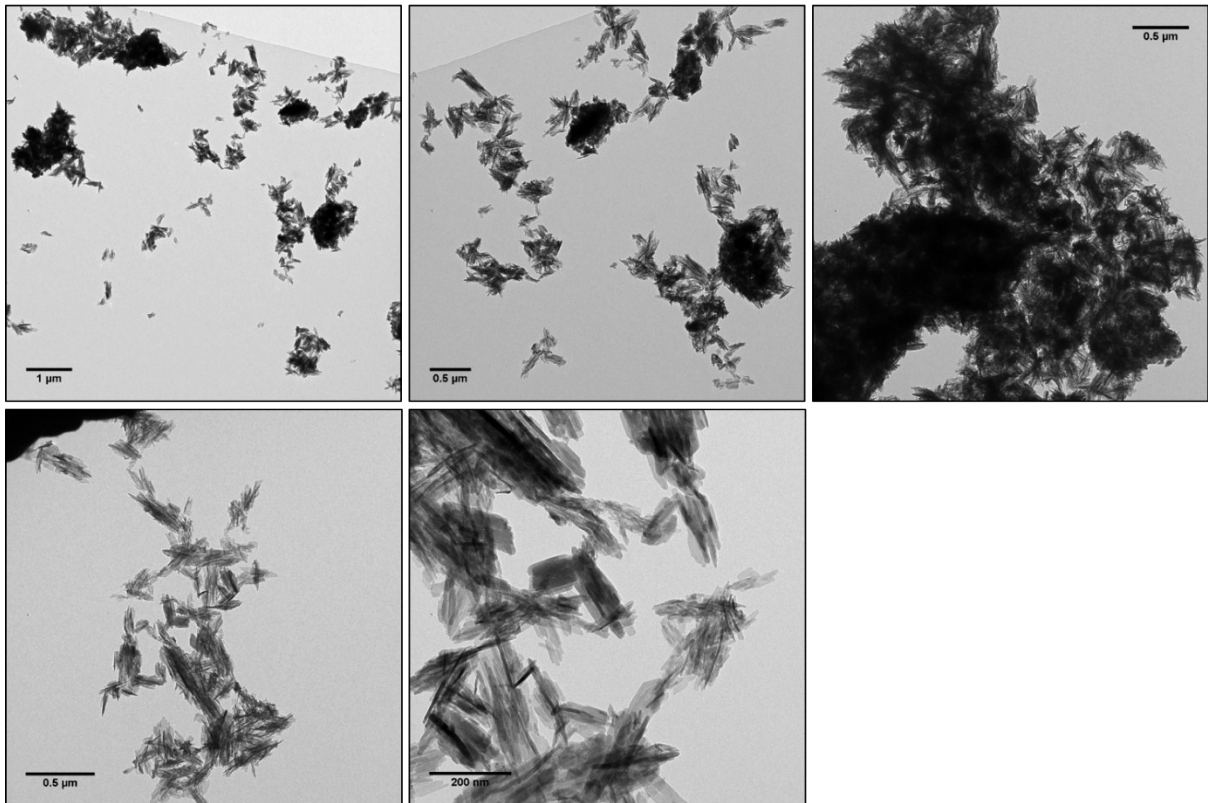

HA NoP

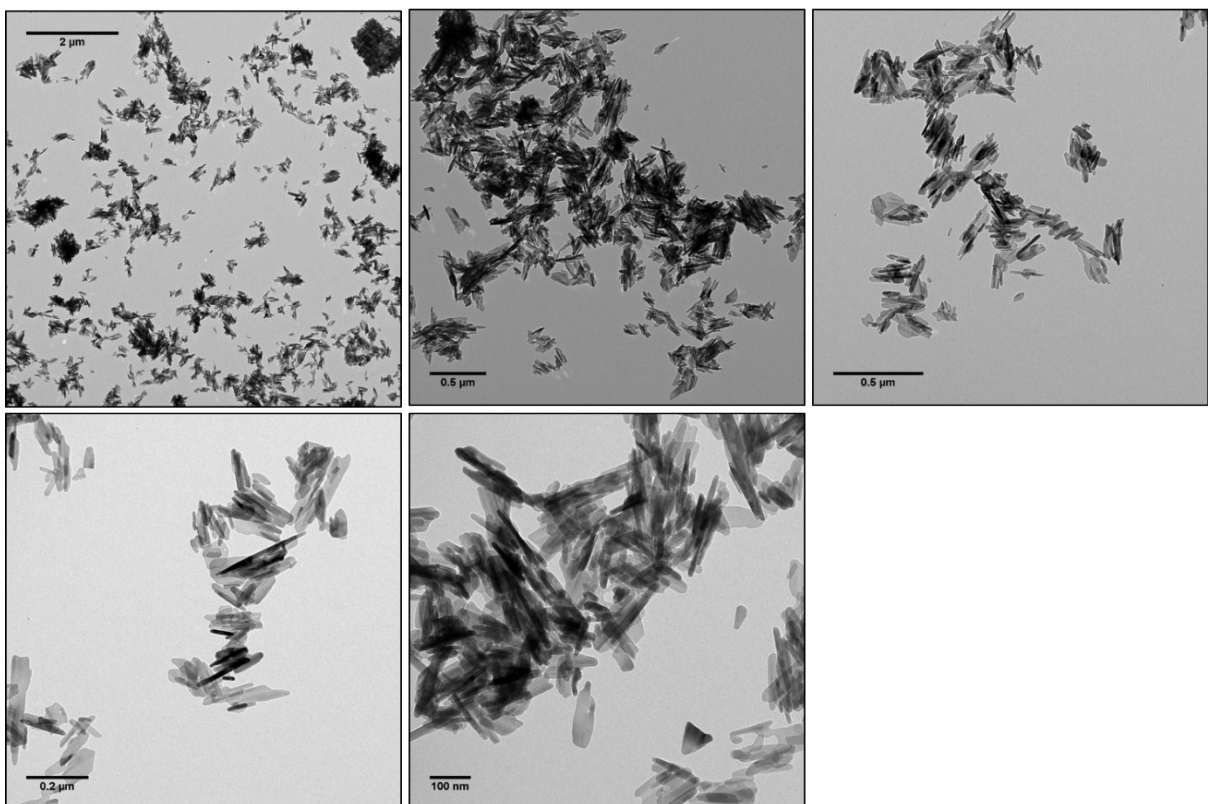

HA PAA-VBD

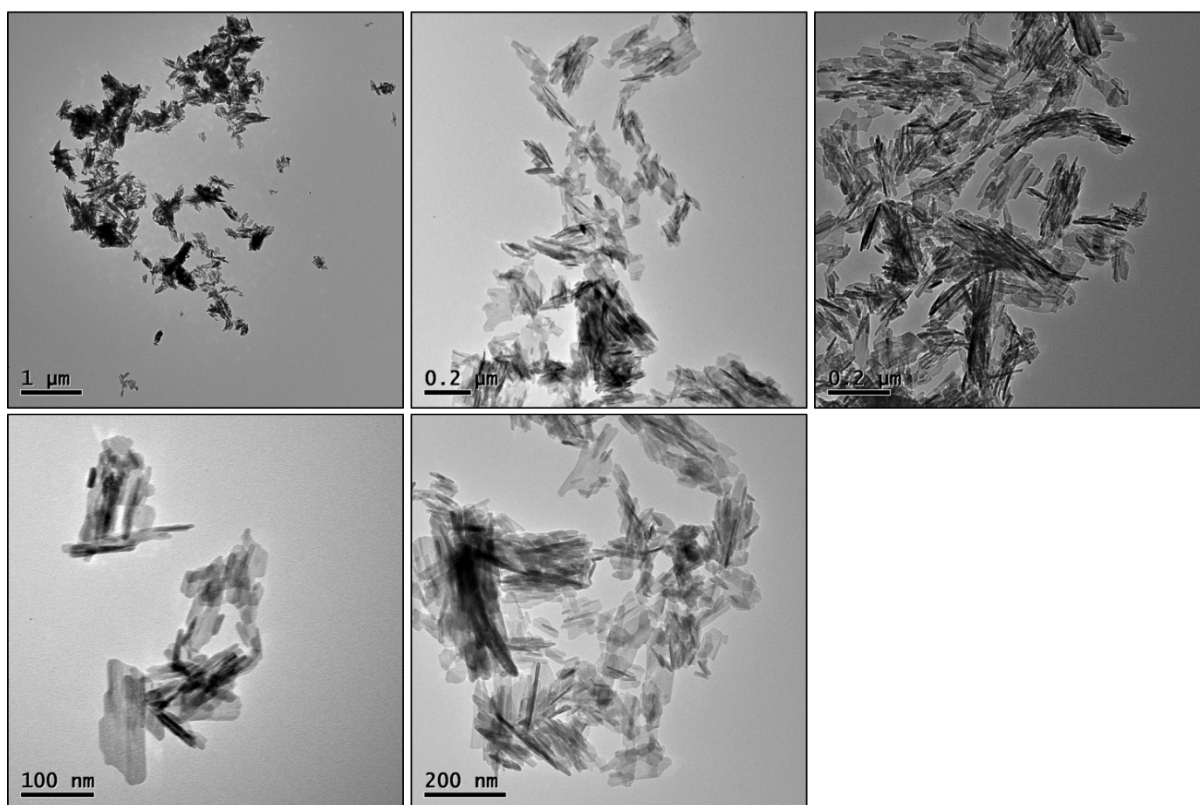

HA PAA-VPC

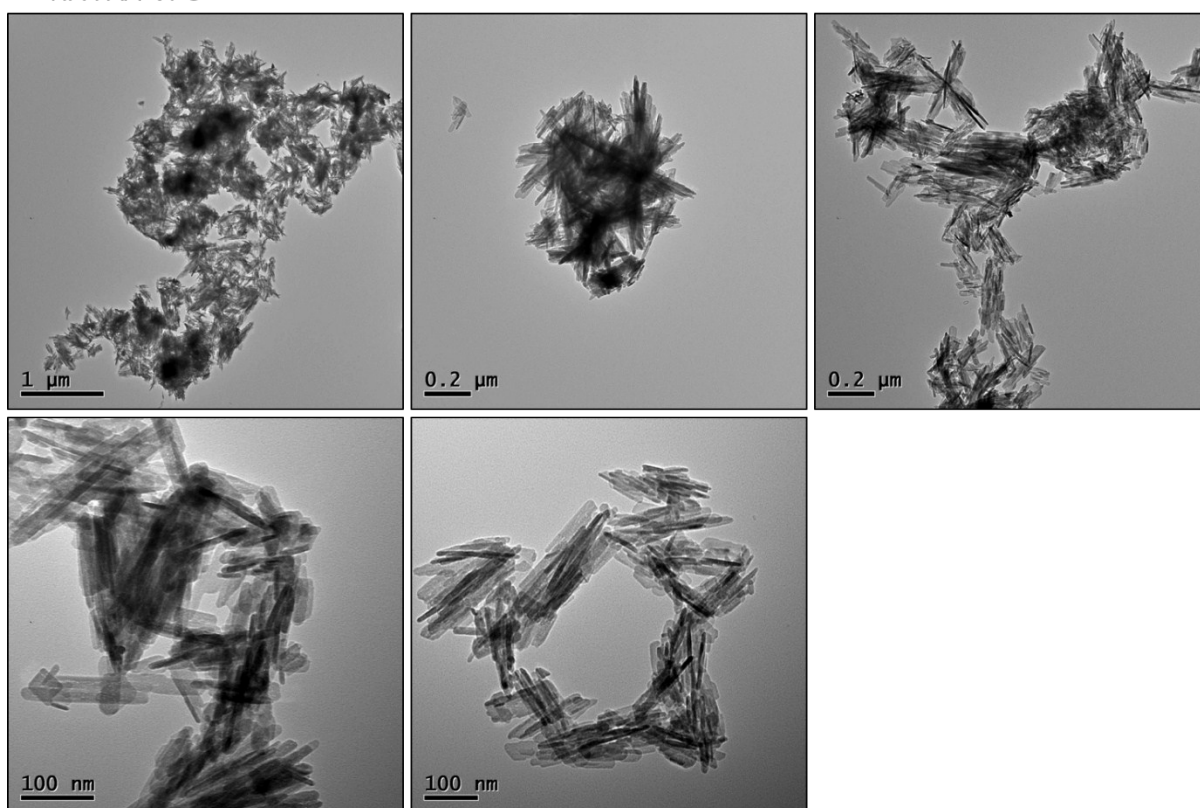

Supplement: c7tb00144d1.pdf [file c7tb00144d1.pdf]
